# Supplementary material
Source: publisher site journal article supplement (https://www.dovepress.com/get_supplementary_file.php?f=216194.docx)
Supplement: Supplementary file 1 [file get_supplementary_file.php]

**Supporting Information**

Tumor-targeting photodynamic therapy based on folate-modified polydopamine nanoparticles

**Table of Contents**

1. **Figure S1**. Chemical structure of Pc
2. **Figure S2**. Dynamic light scattering (DLS) analysis of PDA, PDA-FA and PDA-FA-Pc.
3. **Figure S3.** Hydrodynamic diameters of PDA and PDA-FA-Pc nanomedicine in PBS determined by dynamic light scattering (DLS) analysis. PDA and PDA-FA-Pc nanomedicine were standing at room temperature for 0, 4, and 8 days before determination.
4. **Figure S4.** Apparent images of PDA-FA-Pc nanomedicine dispersed in aqueous solutions: water, PBS, and PBS with 20% fetal bovine serum (FBS) before and after standing at room temperature for 24 h.
5. **Figure S5.** UV-vis absorption spectra of pure FA and Pc in PBS.
6. **Figure S6**. The release of the monomeric Pc molecules from PDA-Pc in acidic (pH 5) and neutralized (pH 7) conditions.
7. **Figure S7**. ROS production of PDA-FA-Pc nanomedicine in PBS.
8. **Figure S8.** The phototoxicities and dark toxicities of PDA (a) and PDA-FA (b) in the Hela cell line.The survival rates were determined after incubation with PDA or PDA-FAat various concentrations with and without illumination at 680 nm with the same light dose in Figure 5.
9. **Figure S9**. Body weights of mice during the *in vivo* experiments.
10. **References**





**Figure S1.** Chemical structure of the photosensitizer (Pc) used in this study.[1, 2]


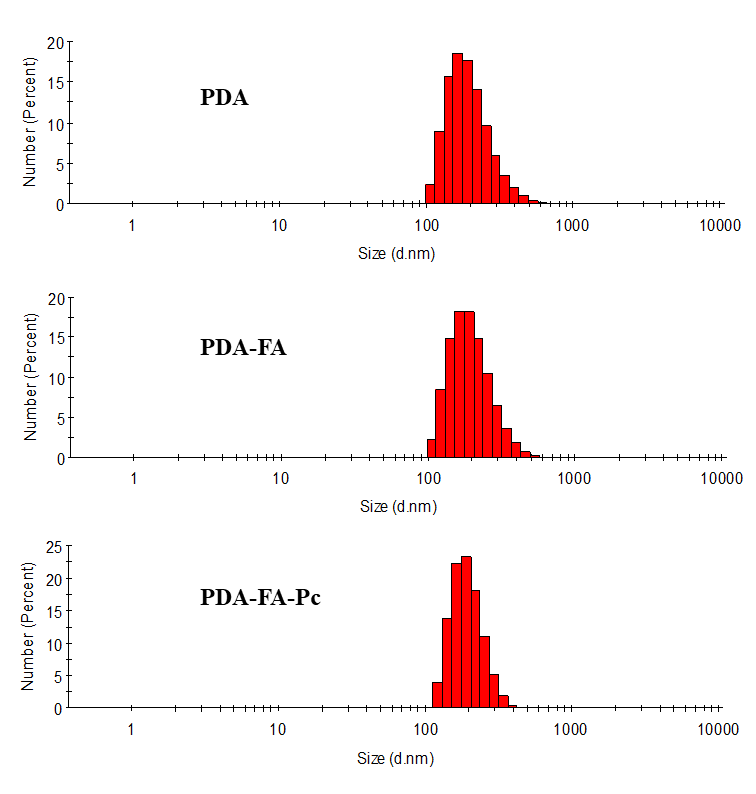


**Figure S2**. Dynamic light scattering (DLS) analysis of PDA, PDA-FA and PDA-FA-Pc.


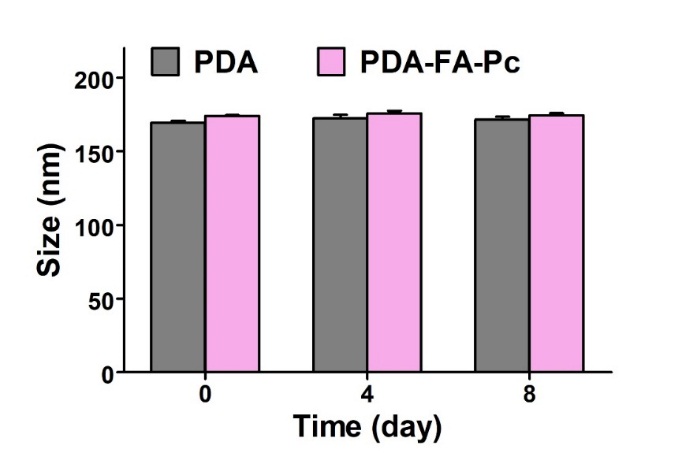


**Figure S3**. Hydrodynamic diameters of PDA and PDA-FA-Pc nanomedicine in PBS determined by dynamic light scattering (DLS) analysis. PDA and PDA-FA-Pc nanomedicine were standing at room temperature for 0, 4, and 8 days before determination.


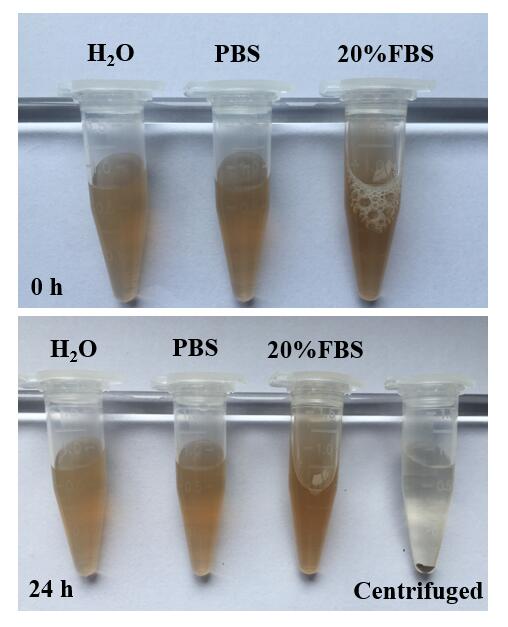


**Figure S4.** Apparent images of PDA-FA-Pc nanomedicine dispersed in aqueous solutions: water, PBS, and PBS with 20% fetal bovine serum (FBS) before and after standing at room temperature for 24 h.


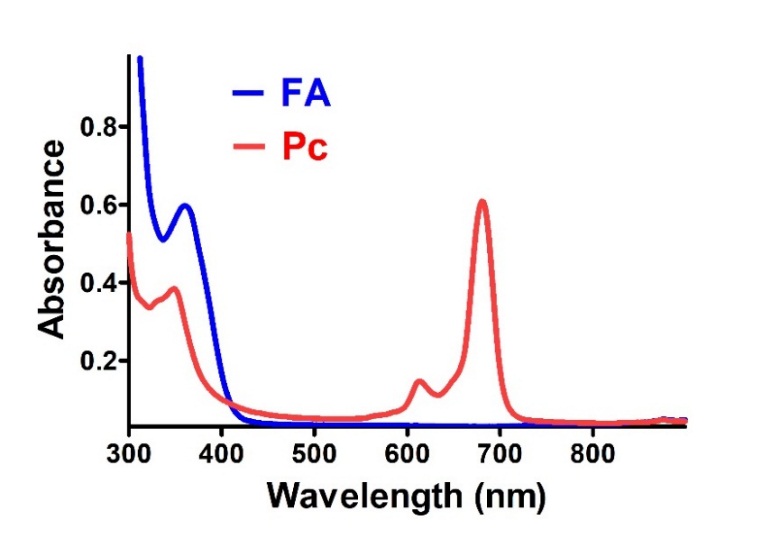


**Figure S5.** UV-vis absorption spectra of pure FA and Pc in PBS.


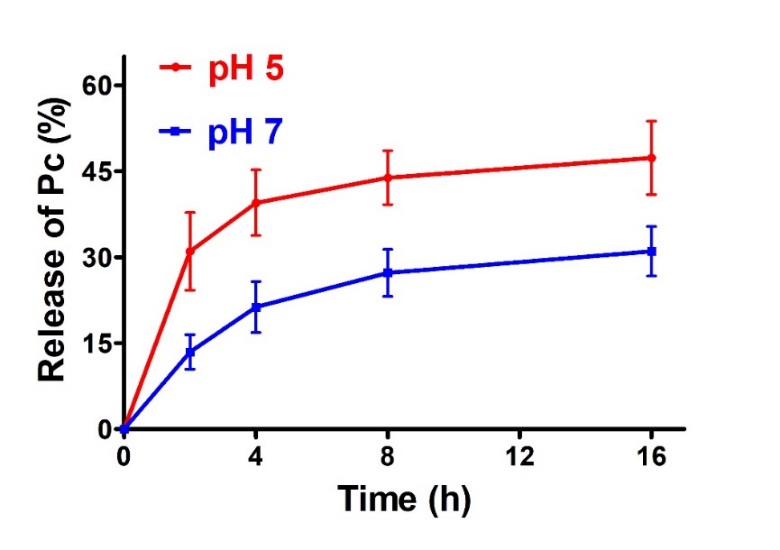


**Figure S6**. The release of the monomeric Pc molecules from PDA-Pc in acidic (pH 5) and neutralized (pH 7) conditions.


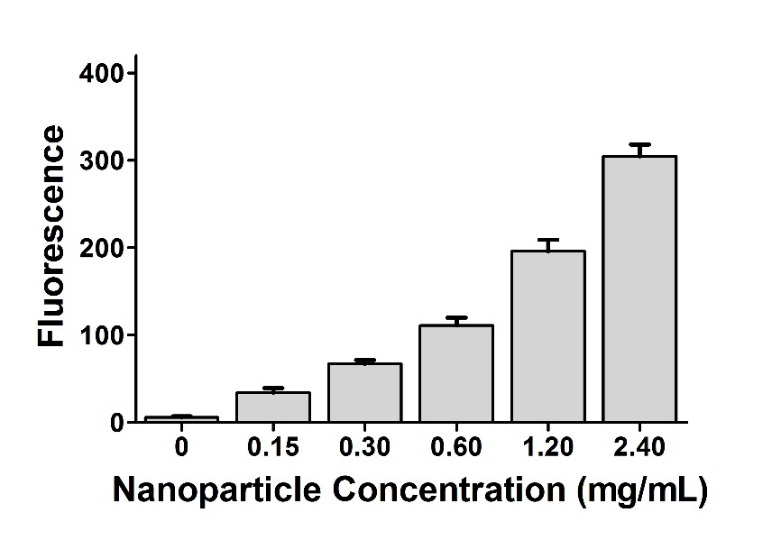


**Figure S7**. ROS production of PDA-FA-Pc nanomedicine in PBS.


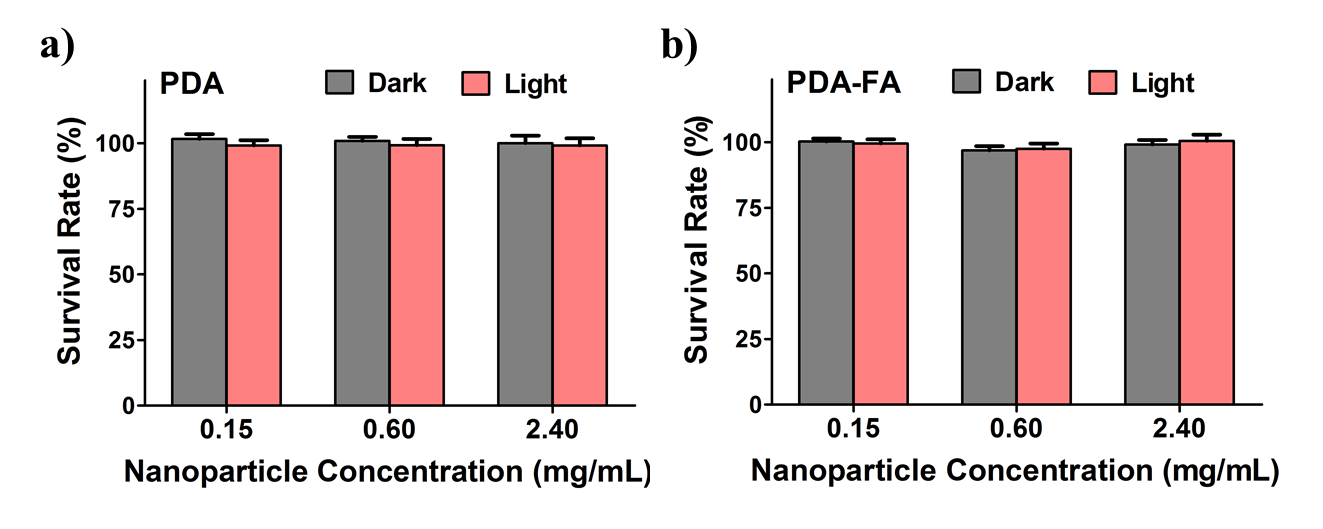


**Figure S8.** The phototoxicities and dark toxicities of PDA (a) and PDA-FA (b) in the Hela cell line.The survival rates were determined after incubation with PDA or PDA-FAat various concentrations with and without illumination at 680 nm with the same light dose in Figure 5.


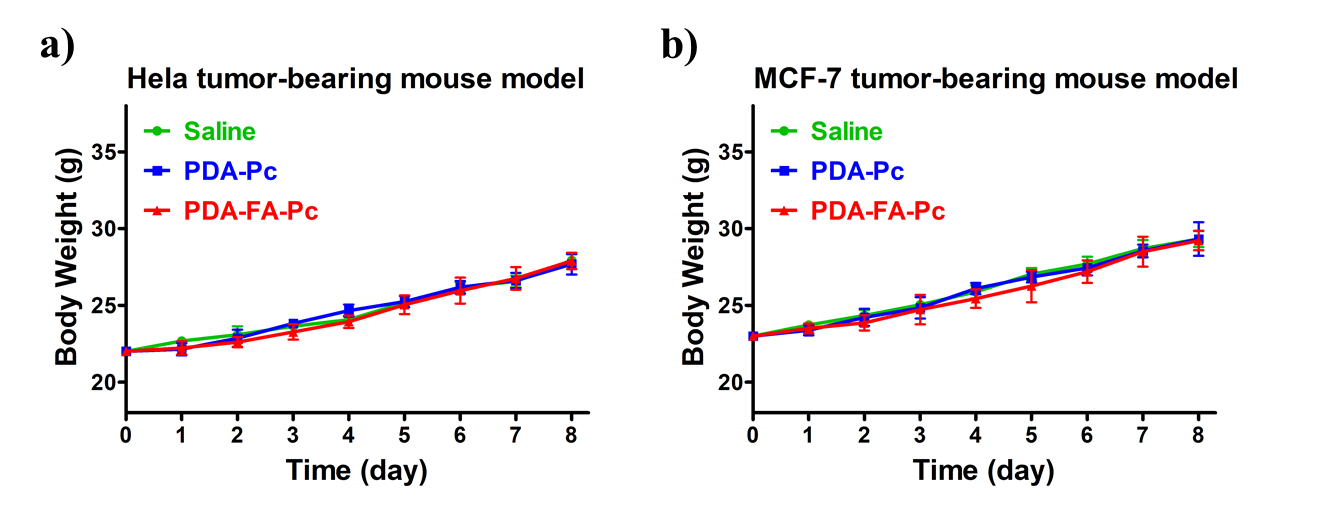


**Figure S9.** Body weights of mice during the *in vivo* experiments.

**References**

[1] X. S. Li, J. Guo, J. J. Zhuang, B. Y. Zheng, M. R. Ke and J. D. Huang, *Bioorganic & Medicinal Chemistry Letters*, 2015, 25, 2386.

[2] Y. X. Zhang, K. Zheng, Z. Chen, J. C. Chen, P. Hu, L. R. Cai, Z. Iqbal and M. D. Huang, *Appl. Microbiol. Biot.*, 2017, 101, 4691.
